# Supplementary material for: Polytopic membrane protein folding at L17 in the ribosome tunnel initiates cyclical changes at the translocon
Source: PubMed Central journal article supplement — J Cell Biol. 2011 Oct 3;195(1):55–70. doi: 10.1083/jcb.201103118 (PMC3187706; doi:10.1083/jcb.201103118), 2011-10-03
Supplement: supp_jcb.201103118_JCB_201103118_sm.pdf [file supp_jcb.201103118_JCB_201103118_sm.pdf]

Lin et al., <http://www.jcb.org/cgi/content/full/jcb.201103118/DC1>

**VSVG**      **RSS**    **IASFFFIIGLIIGLFLVL**    **REF**

**Opsin 2**    **PLN**    **YILLNLAVADLFMVFGGFTTLY**    **TSL**

**Opsin 3**    **LEG**    **FFATLGGEIALWSLVVLA**    **ERY**

Figure S1. **TMS sequences and probe locations.** The primary sequences of the VSVG, opsin 2, and opsin 3 TMSs (TMS1, TMS2, and TMS3, respectively) are shown (boxed in blue), as are the three flanking residues for the TMSs in the 2TM and 3TM constructs. The residues in TMS2 replaced, one at a time, with  $\epsilon$ ANB-Lys probes, are shown in red. Note that after modification of the lysine  $\epsilon$ -amino group with a BOP, NBD, Ac, or ANB probe, the incorporated lys is no longer charged.
